# Supplementary material
Source: Springer Nature journal article supplement (https://www.springermedizin.de/resource/supplementary/12913_2008_1020_MOESM2_ESM.pdf/9536152)

## B1. Age at time of first diagnosis of ADHD

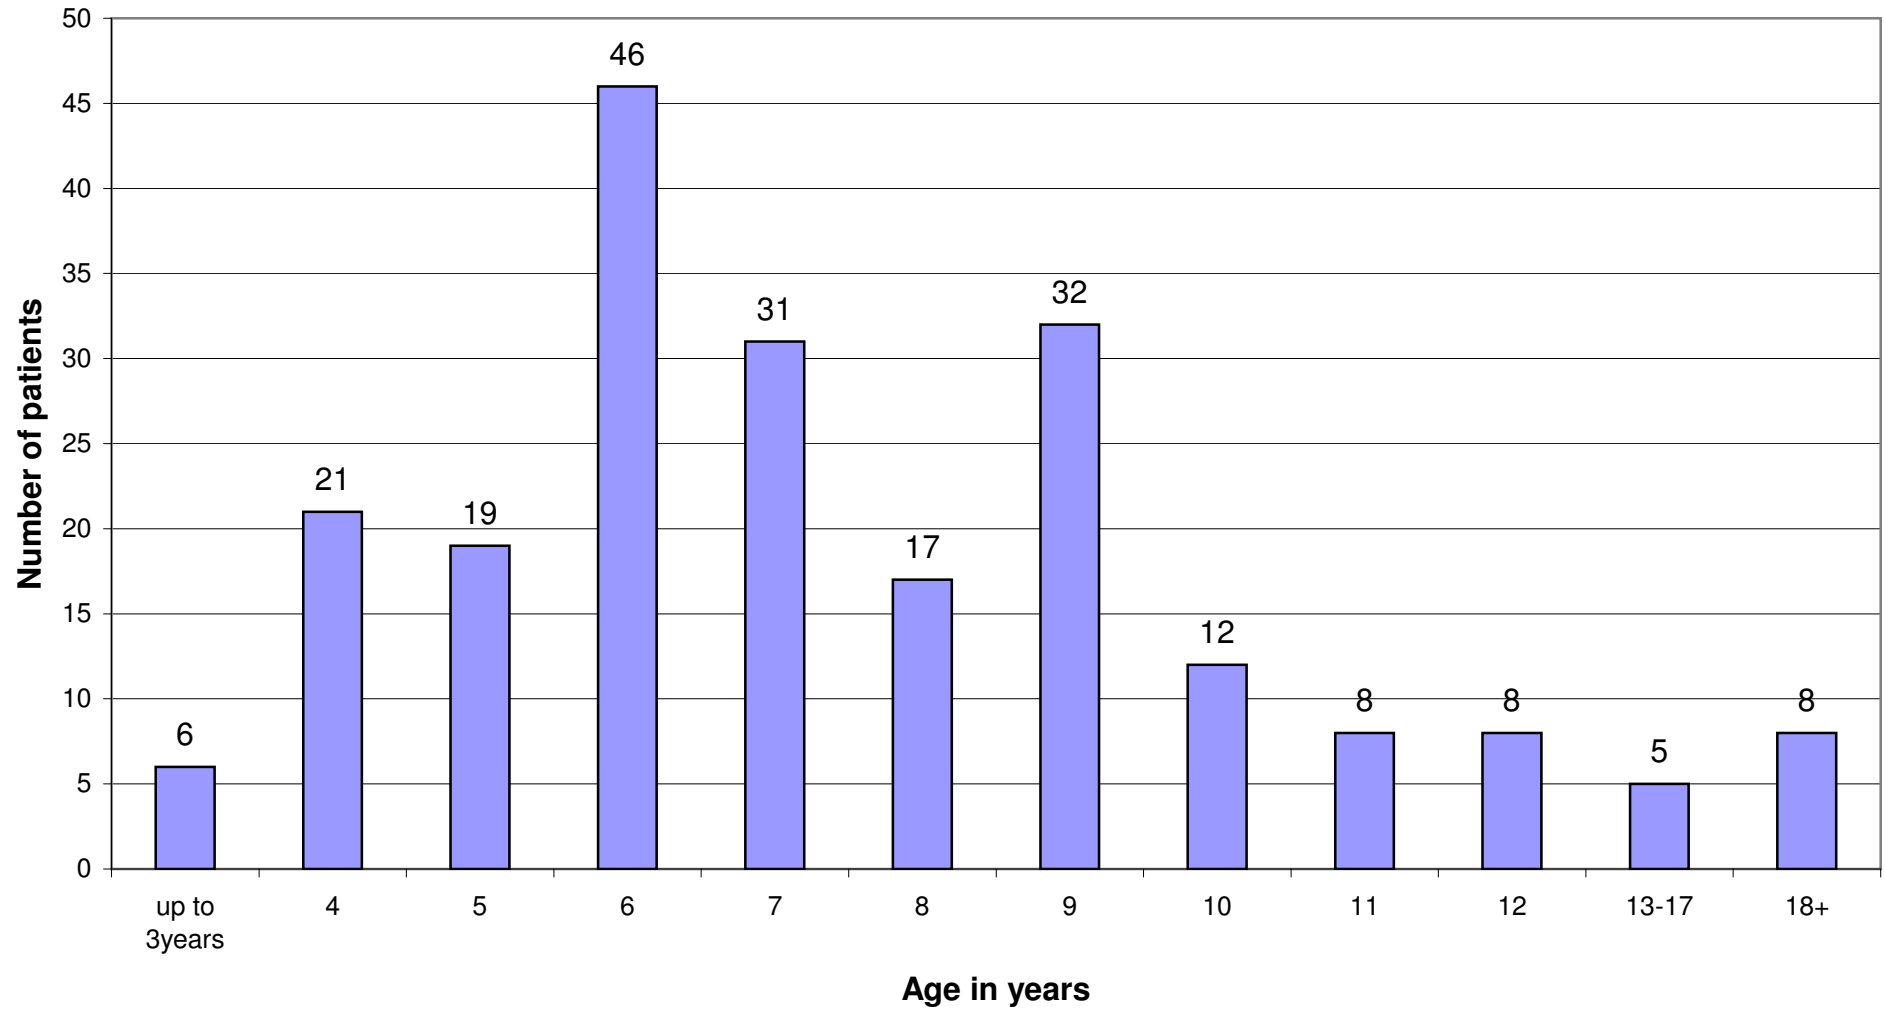

Supplement: MOESM2 [file 9536152]
